# Supplementary material for: Self-assembly of magnetic poly(ionic liquid)s and ionic liquids in aqueous solution
Source: Royal Society of Chemistry journal article supplement (doi:10.1039/c8py01254g), 2018-01-01
Supplement: c8py01254g1.pdf [file c8py01254g1.pdf]

## Electronic Supplementary Information

### **Self-Assembly of Magnetic Poly(ionic liquid)s and Ionic Liquids in Aqueous Solution**

Xiaoliang Yu, Xiaoyan Yuan\*, Zhengyi Xia, and Lixia Ren\*

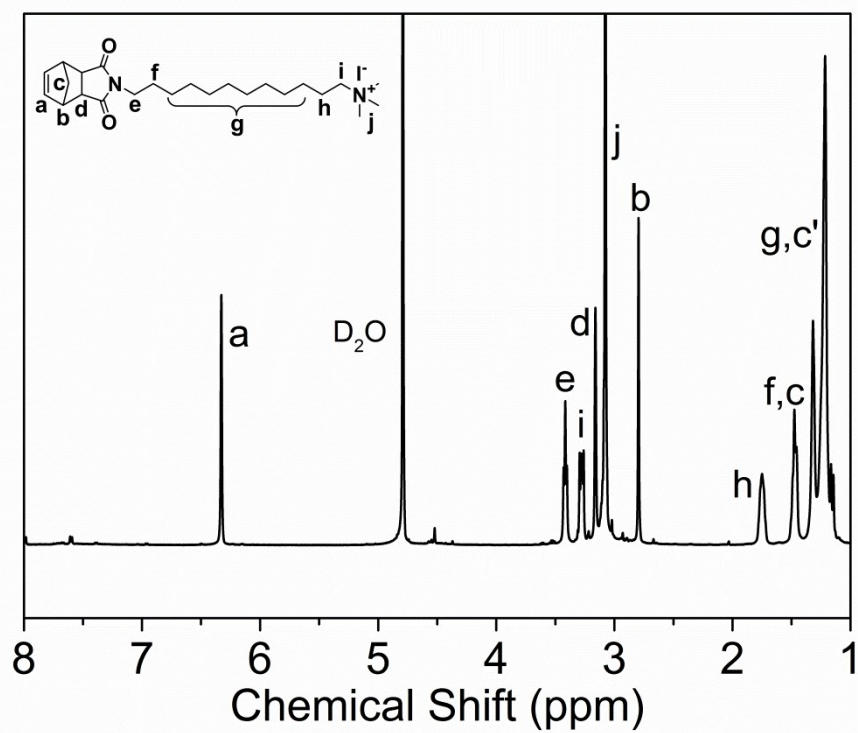

Fig. S1 <sup>1</sup>H NMR spectrum of compound 5 in D<sub>2</sub>O.

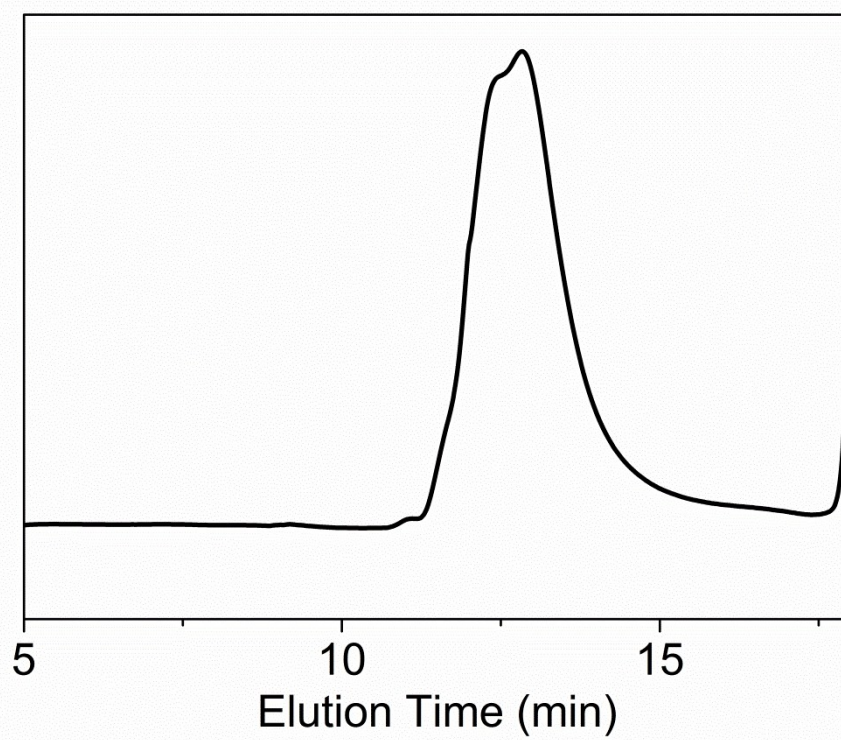

Fig. S2 GPC trace of PDHMTA[Cl].

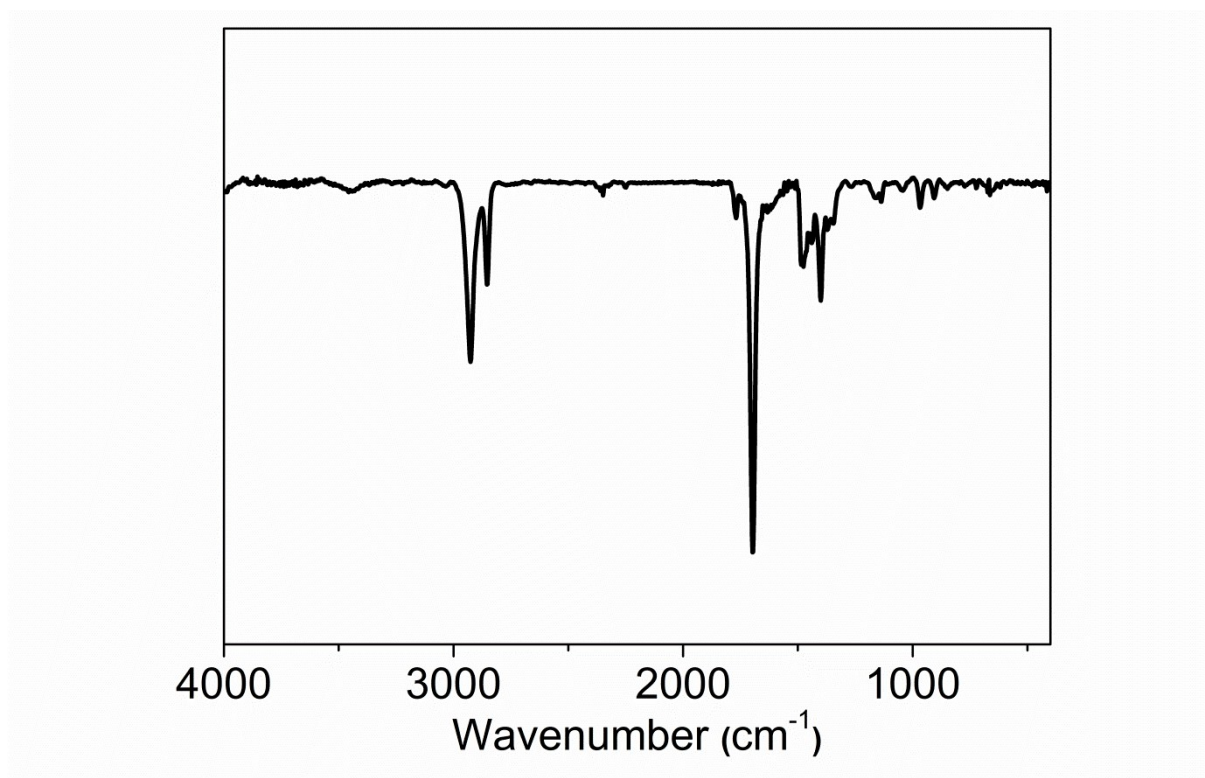

Fig. S3 FTIR spectrum of PDHMTA[FeCl<sub>4</sub>].

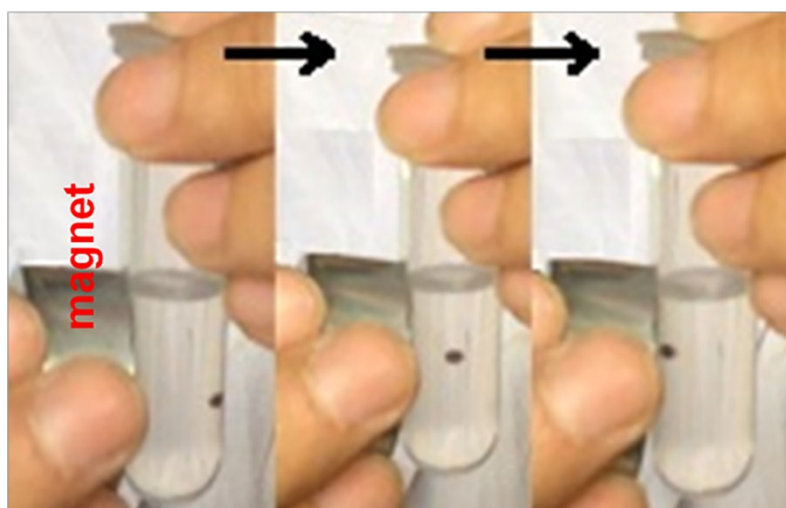

Fig. S4 The movement of PDHMTA[FeCl<sub>4</sub>] under the action of a magnet.
